# Supplementary material
Source: HighWire-hosted journal article supplement (https://www.cmaj.ca/highwire/filestream/58692/field_highwire_adjunct_files/0/what-macfadden-1-at.pdf)

**Appendix 1 (as supplied by the authors): Tissue samples from a biopsy of a breast mass from a 56-year old man.** (A) Micrograph stained with Grocott's methenamine silver stain (400 × magnification) showing single budding yeast forms (arrow). The budding pattern throughout the slide could not be definitively characterized as either broad or narrow based. (B) Micrograph stained with periodic acid – Schiff (PAS) stain (600 × magnification) showing one broad-based budding yeast form with a doubly refractile cell wall (arrow).

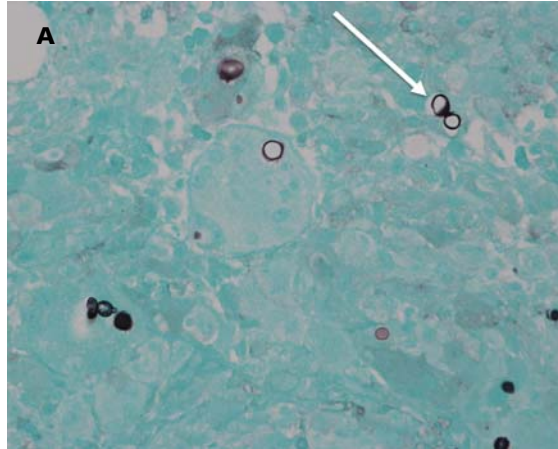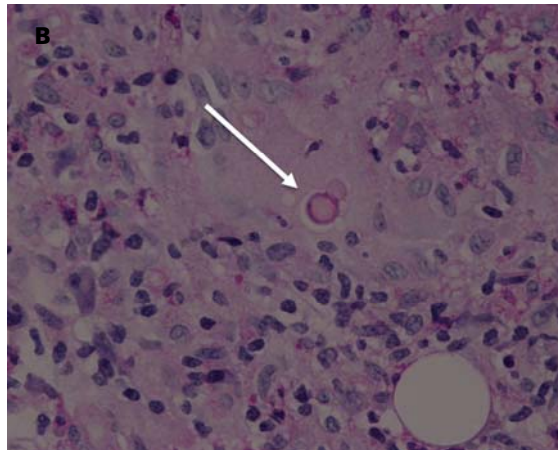

Supplement: what-macfadden-1-at.pdf [file what-macfadden-1-at.pdf]
